# Supplementary material for: Drivers of Insect Community Change along the Margins of Mountain Streams in Serra da Estrela Natural Park (Portugal)
Source: MDPI journal article supplement (doi:10.3390/insects14030243), 2023-02-28
Supplement: s1 [file s1]

|                                |   |   |   |   |   |   |   |   |   |
|--------------------------------|---|---|---|---|---|---|---|---|---|
| <i>Argynnis paphia</i>         | 1 | 1 | 0 | 0 | 1 | 0 | 0 | 0 | 0 |
| <i>Aricia cramera</i>          | 0 | 0 | 1 | 1 | 1 | 1 | 1 | 1 | 0 |
| <i>Brintesia circe</i>         | 1 | 1 | 0 | 1 | 1 | 1 | 1 | 1 | 0 |
| <i>Celastrina argiolus</i>     | 1 | 1 | 0 | 1 | 1 | 1 | 1 | 1 | 1 |
| <i>Charaxes jasius</i>         | 0 | 0 | 1 | 0 | 0 | 0 | 0 | 0 | 0 |
| <i>Coenonympha dorus</i>       | 0 | 0 | 0 | 0 | 1 | 0 | 0 | 0 | 0 |
| <i>Coenonympha pamphilus</i>   | 1 | 1 | 0 | 0 | 0 | 0 | 1 | 0 | 0 |
| <i>Colias crocea</i>           | 1 | 1 | 1 | 1 | 1 | 1 | 1 | 1 | 1 |
| <i>Cyaniris semiargus</i>      | 0 | 0 | 0 | 0 | 1 | 1 | 0 | 1 | 0 |
| <i>Euphydryas aurinia</i>      | 0 | 0 | 0 | 0 | 0 | 1 | 0 | 0 | 0 |
| <i>Fabriciana adippe</i>       | 1 | 1 | 0 | 1 | 1 | 0 | 1 | 0 | 1 |
| <i>Glaucopsyche melanops</i>   | 0 | 0 | 0 | 1 | 0 | 0 | 0 | 0 | 0 |
| <i>Gonepteryx rhamni</i>       | 1 | 1 | 1 | 1 | 1 | 1 | 1 | 0 | 1 |
| <i>Hesperia comma</i>          | 1 | 1 | 0 | 1 | 1 | 0 | 1 | 1 | 0 |
| <i>Hipparchia fidia</i>        | 0 | 1 | 0 | 0 | 1 | 1 | 0 | 0 | 0 |
| <i>Hipparchia hermione</i>     | 1 | 1 | 0 | 1 | 1 | 1 | 1 | 1 | 0 |
| <i>Hipparchia semele</i>       | 1 | 1 | 1 | 1 | 1 | 1 | 0 | 0 | 0 |
| <i>Hipparchia statilinus</i>   | 0 | 0 | 0 | 0 | 1 | 1 | 1 | 0 | 0 |
| <i>Hyponephele lycaon</i>      | 0 | 1 | 0 | 0 | 1 | 0 | 1 | 1 | 0 |
| <i>Iphiclides feisthamelii</i> | 0 | 0 | 1 | 0 | 1 | 1 | 0 | 0 | 0 |
| <i>Issoria lathonia</i>        | 0 | 0 | 0 | 0 | 1 | 0 | 1 | 1 | 1 |
| <i>Laeosopis roboris</i>       | 1 | 1 | 1 | 0 | 0 | 0 | 0 | 0 | 0 |
| <i>Lampides boeticus</i>       | 0 | 0 | 0 | 0 | 1 | 0 | 1 | 0 | 0 |
| <i>Lasiommata megera</i>       | 1 | 1 | 1 | 1 | 1 | 1 | 0 | 1 | 0 |
| <i>Leptidea sinapis</i>        | 1 | 1 | 1 | 1 | 1 | 1 | 1 | 0 | 0 |
| <i>Leptotes pirithous</i>      | 1 | 1 | 1 | 1 | 1 | 1 | 1 | 1 | 0 |
| <i>Limenitis reducta</i>       | 1 | 1 | 1 | 1 | 0 | 0 | 0 | 0 | 0 |

**Table S3.** (continued). Butterfly species occurrence (1=present; 0=not observed) at study sites on the margins of different mountain streams (A- Fervença, B - Caniça and C- Loriga) and elevation levels (500m, 1000m and 1500m). Butterfly species are listed alphabetically.

| Elevation (m)                | 500 | 500 | 500 | 1000 | 1000 | 1000 | 1500 | 1500 | 1500 |
|------------------------------|-----|-----|-----|------|------|------|------|------|------|
| Mountain stream              | A   | B   | C   | A    | B    | C    | A    | B    | C    |
| Butterfly species            |     |     |     |      |      |      |      |      |      |
| <i>Lycaena alciphron</i>     | 1   | 0   | 1   | 1    | 1    | 0    | 0    | 0    | 1    |
| <i>Lycaena bleusei</i>       | 0   | 0   | 1   | 0    | 1    | 0    | 0    | 0    | 0    |
| <i>Lycaena phlaeas</i>       | 1   | 1   | 1   | 1    | 1    | 1    | 1    | 0    | 1    |
| <i>Lycaena tityrus</i>       | 0   | 0   | 1   | 0    | 1    | 0    | 0    | 0    | 0    |
| <i>Maniola jurtina</i>       | 0   | 0   | 1   | 1    | 1    | 1    | 0    | 0    | 0    |
| <i>Melanargia lachesis</i>   | 1   | 1   | 1   | 1    | 1    | 1    | 1    | 1    | 1    |
| <i>Melanargia occitanica</i> | 0   | 0   | 0   | 0    | 1    | 0    | 0    | 0    | 0    |
| <i>Melanargia russiae</i>    | 0   | 0   | 0   | 0    | 1    | 0    | 0    | 0    | 0    |

|                              |   |   |   |   |   |   |   |   |   |
|------------------------------|---|---|---|---|---|---|---|---|---|
| <i>Melitaea deione</i>       | 1 | 1 | 1 | 1 | 1 | 1 | 0 | 0 | 0 |
| <i>Melitaea nevadensis</i>   | 1 | 0 | 0 | 1 | 1 | 1 | 1 | 1 | 0 |
| <i>Melitaea parthenoides</i> | 0 | 0 | 1 | 0 | 0 | 1 | 0 | 0 | 0 |
| <i>Melitaea phoebe</i>       | 0 | 0 | 0 | 0 | 1 | 1 | 0 | 0 | 0 |
| <i>Melitaea trivia</i>       | 0 | 0 | 0 | 0 | 1 | 1 | 0 | 0 | 0 |
| <i>Nymphalis antiopa</i>     | 0 | 1 | 1 | 1 | 0 | 0 | 0 | 0 | 1 |
| <i>Ochlodes sylvanus</i>     | 1 | 1 | 0 | 0 | 1 | 0 | 0 | 0 | 0 |
| <i>Pararge aegeria</i>       | 1 | 1 | 1 | 1 | 1 | 1 | 1 | 0 | 1 |
| <i>Pieris brassicae</i>      | 1 | 1 | 1 | 1 | 1 | 1 | 0 | 0 | 0 |
| <i>Pieris napi</i>           | 1 | 1 | 1 | 1 | 1 | 1 | 0 | 0 | 0 |
| <i>Pieris rapae</i>          | 1 | 1 | 1 | 1 | 1 | 1 | 1 | 1 | 1 |
| <i>Plebejus argus</i>        | 0 | 0 | 0 | 1 | 1 | 0 | 1 | 1 | 1 |
| <i>Polygonia c-album</i>     | 1 | 1 | 0 | 0 | 0 | 0 | 0 | 0 | 0 |
| <i>Polyommatus icarus</i>    | 1 | 1 | 1 | 1 | 1 | 0 | 1 | 0 | 0 |
| <i>Pontia daplidice</i>      | 0 | 1 | 1 | 1 | 1 | 1 | 0 | 1 | 1 |
| <i>Pyrgus malvoides</i>      | 0 | 0 | 0 | 1 | 0 | 0 | 0 | 1 | 0 |
| <i>Pyronia cecilia</i>       | 0 | 0 | 1 | 0 | 1 | 0 | 0 | 0 | 0 |
| <i>Pyronia tithonus</i>      | 1 | 1 | 1 | 1 | 1 | 1 | 1 | 1 | 0 |
| <i>Satyrium esculi</i>       | 0 | 0 | 1 | 0 | 0 | 0 | 0 | 0 | 0 |
| <i>Satyrium spini</i>        | 1 | 1 | 1 | 1 | 1 | 0 | 0 | 0 | 0 |
| <i>Satyrus actaea</i>        | 1 | 1 | 0 | 0 | 0 | 0 | 0 | 1 | 1 |
| <i>Speyeria aglaja</i>       | 0 | 0 | 0 | 0 | 1 | 0 | 1 | 0 | 0 |
| <i>Thymelicus acteon</i>     | 0 | 0 | 1 | 0 | 1 | 0 | 0 | 0 | 0 |
| <i>Thymelicus lineola</i>    | 0 | 0 | 0 | 0 | 0 | 1 | 1 | 0 | 0 |
| <i>Thymelicus sylvestris</i> | 1 | 0 | 0 | 1 | 1 | 1 | 1 | 0 | 1 |
| <i>Vanessa atalanta</i>      | 0 | 0 | 0 | 1 | 0 | 0 | 1 | 0 | 0 |
| <i>Vanessa cardui</i>        | 0 | 0 | 0 | 0 | 0 | 0 | 1 | 1 | 0 |

[illegible]

|                                 |   |   |   |   |   |   |   |   |   |
|---------------------------------|---|---|---|---|---|---|---|---|---|
| <i>Lestes viridis</i>           | 0 | 1 | 1 | 0 | 0 | 0 | 0 | 0 | 0 |
| <i>Libellula depressa</i>       | 0 | 0 | 1 | 0 | 0 | 0 | 0 | 0 | 0 |
| <i>Libellula quadrimaculata</i> | 0 | 0 | 0 | 0 | 0 | 0 | 0 | 1 | 1 |
| <i>Macromia splendens</i>       | 0 | 0 | 1 | 0 | 0 | 0 | 0 | 0 | 0 |
| <i>Onychogomphus uncatus</i>    | 1 | 0 | 1 | 1 | 1 | 1 | 0 | 0 | 1 |
| <i>Orthetrum coerulescens</i>   | 1 | 0 | 1 | 0 | 0 | 0 | 0 | 0 | 0 |
| <i>Oxygastra curtisii</i>       | 0 | 0 | 1 | 0 | 0 | 0 | 0 | 0 | 0 |
| <i>Platycnemis latipes</i>      | 0 | 1 | 1 | 0 | 0 | 1 | 0 | 0 | 0 |
| <i>Pyrrosoma nymphula</i>       | 1 | 1 | 1 | 1 | 1 | 1 | 1 | 1 | 1 |
| <i>Sympetrum flaveolum</i>      | 0 | 0 | 0 | 0 | 0 | 0 | 0 | 1 | 0 |
| <i>Sympetrum fonscolombii</i>   | 0 | 0 | 0 | 0 | 0 | 0 | 0 | 1 | 0 |
| <i>Sympetrum sanguineum</i>     | 0 | 0 | 0 | 0 | 0 | 0 | 0 | 1 | 0 |
| <i>Sympetrum striolatum</i>     | 0 | 1 | 0 | 0 | 0 | 0 | 0 | 0 | 0 |

**Table S5.** Butterfly alpha diversity in the study sites on the margins of mountain streams (A- Fer-vença, B - Caniça and C- Loriga) at different elevation levels (500m, 1000m and 1500m). SR: observed species richness, Abund: abundance, EShan: exponential of Shannon diversity index, ISimp: reciprocal of Simpson's diversity index, BP: reciprocal of Berger-Parker index, SR<sub>estim</sub>: estimated species richness, Comp: completeness.

| Elevation<br>(m) | Stream | SR | Abund | EShan | ISimp | BP   | Evenness | SR <sub>estim</sub> | Comp |
|------------------|--------|----|-------|-------|-------|------|----------|---------------------|------|
| 500              | A      | 32 | 188   | 20.0  | 13.6  | 0.16 | 0.54     | 39                  | 0.82 |
| 500              | B      | 35 | 167   | 21.3  | 14.6  | 0.16 | 0.53     | 48.2                | 0.73 |
| 500              | C      | 33 | 175   | 19.3  | 13.3  | 0.15 | 0.50     | 36.6                | 0.90 |
| 1000             | A      | 35 | 220   | 20.6  | 14.7  | 0.13 | 0.48     | 38.5                | 0.91 |
| 1000             | B      | 48 | 409   | 33.0  | 26.2  | 0.07 | 0.48     | 53.6                | 0.90 |
| 1000             | C      | 32 | 211   | 17.7  | 10.4  | 0.25 | 0.51     | 34.1                | 0.94 |
| 1500             | A      | 29 | 132   | 18.7  | 13.2  | 0.18 | 0.56     | 32.5                | 0.89 |
| 1500             | B      | 22 | 88    | 15.0  | 12.0  | 0.15 | 0.56     | 27.6                | 0.80 |
| 1500             | C      | 16 | 90    | 10.3  | 7.2   | 0.27 | 0.61     | 16                  | 1    |

**Table S6.** Odonate alpha diversity in the study sites on the margins of mountain streams (A- Fer-vença, B - Caniça and C- Loriga) at different altitudinal levels (500m, 1000m and 1500m). SR: observed species richness, Abund: abundance, EShan: exponential of Shannon diversity index, ISimp: reciprocal of Simpson's diversity index, BP: reciprocal of Berger-Parker index, SR<sub>estim</sub>: estimated species richness, Comp: completeness.

| Elevation<br>(m) | Stream | SR | Abund | EShan | ISimp | BP   | Evenness | SR <sub>estim</sub> | Comp |
|------------------|--------|----|-------|-------|-------|------|----------|---------------------|------|
| 500              | A      | 7  | 70    | 5.1   | 4.5   | 0.3  | 0.34     | 8                   | 0.88 |
| 500              | B      | 8  | 105   | 4.2   | 3.1   | 0.5  | 0.33     | 8                   | 1    |
| 500              | C      | 14 | 148   | 8.4   | 6.1   | 0.32 | 0.43     | 15.5                | 0.90 |
| 1000             | A      | 5  | 82    | 4.1   | 3.6   | 0.4  | 0.74     | 5                   | 1    |
| 1000             | B      | 6  | 101   | 3.7   | 3.1   | 0.42 | 0.3      | 6                   | 1    |
| 1000             | C      | 6  | 79    | 3.9   | 3.1   | 0.5  | 0.36     | 6                   | 1    |
| 1500             | A      | 3  | 17    | 2.1   | 1.8   | 0.71 | 0.49     | 3                   | 1    |
| 1500             | B      | 10 | 164   | 4.3   | 2.9   | 0.54 | 0.27     | 10.3                | 0.98 |

|      |   |   |    |     |     |      |      |     |      |
|------|---|---|----|-----|-----|------|------|-----|------|
| 1500 | C | 8 | 30 | 5.9 | 4.7 | 0.37 | 0.62 | 8.3 | 0.96 |
|------|---|---|----|-----|-----|------|------|-----|------|

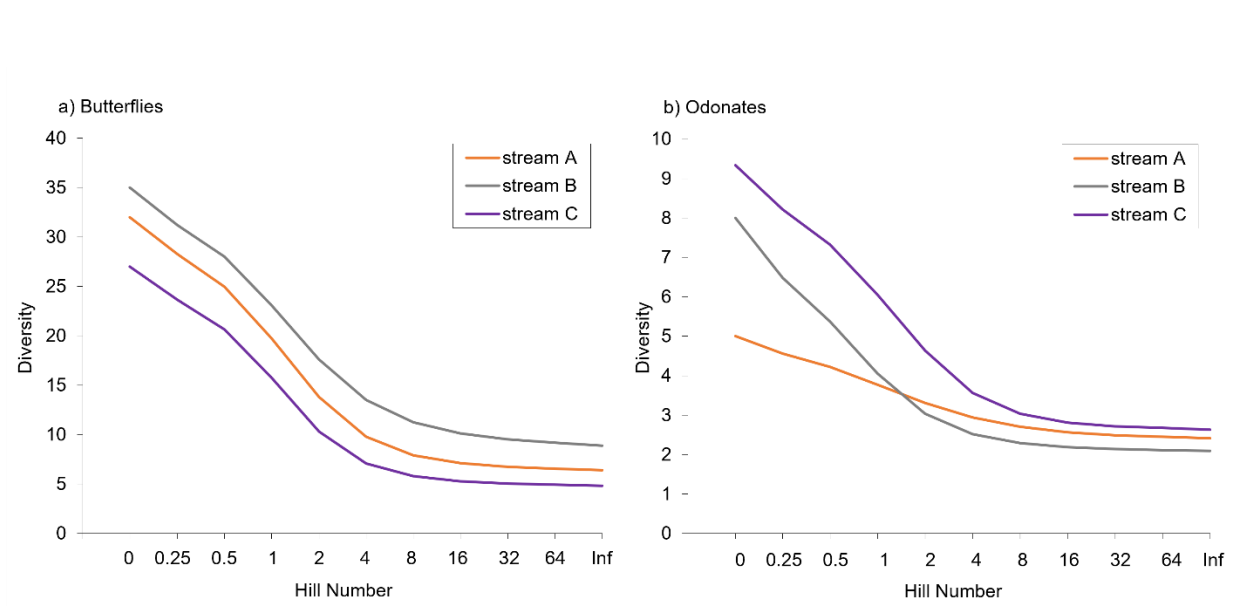

**Figure S1.** Alpha diversity per stream for butterflies (a) and odonates (b) represented by Hill numbers. Stream name codes mean: A-Fervença, B-Caniça and C-Loriga.
